# Supplementary material
Source: Springer Nature journal article supplement (https://www.springermedizin.de/resource/supplementary/13058_2008_2281_MOESM17_ESM.pdf/9701052)

Fig.8

A

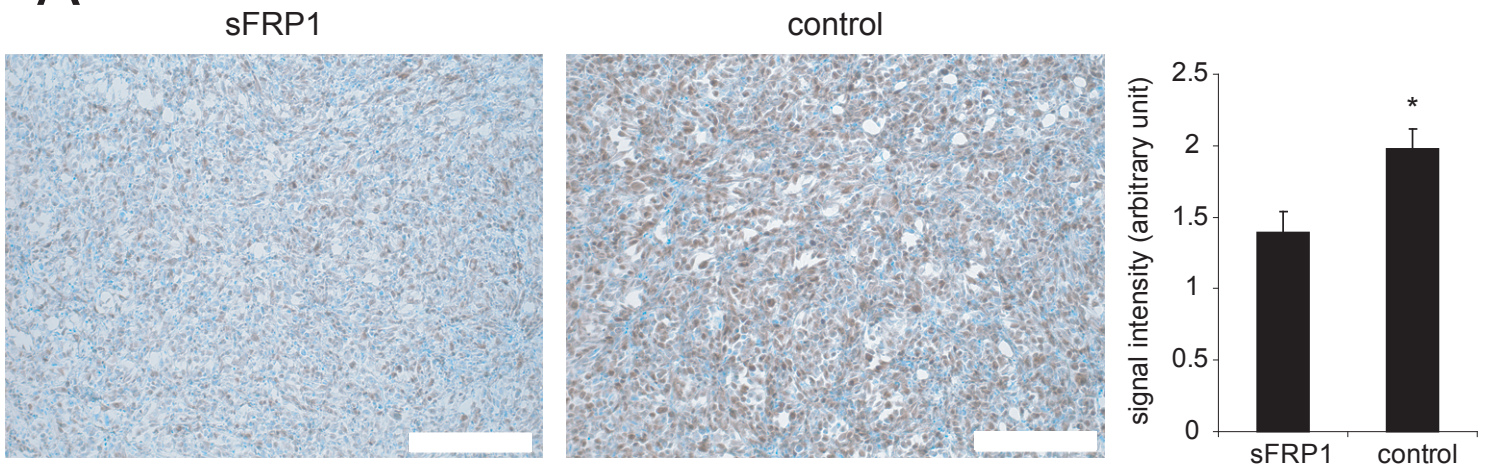

B

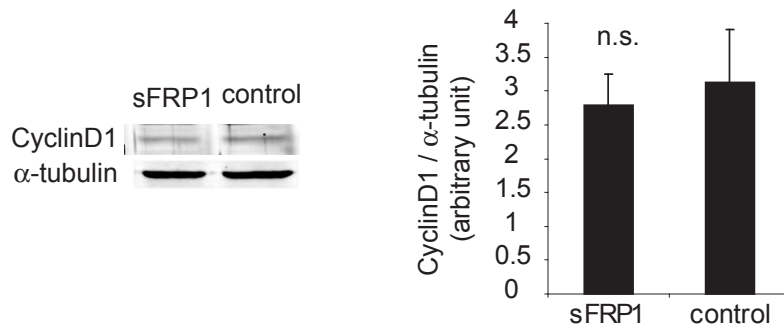

C

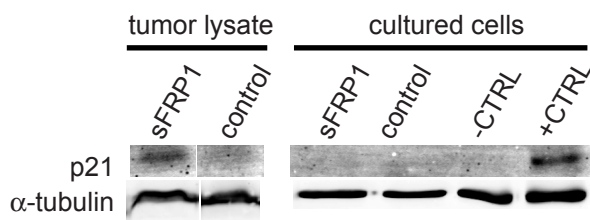

D

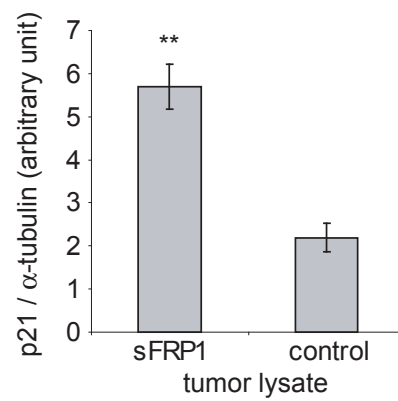

Supplement: MOESM17 [file 9701052]
